# Supplementary material
Source: publisher site journal article supplement (https://www.kjim.org/upload/media/kjim-2021-546-suppl3.pdf)
Supplement: Supplementary file 1 [file kjim-2021-546-suppl3.pdf]

**Supplementary Table 3. Multivariate logistic regression analysis of the Braden Scale subscales for risk of pressure ulcer development**

| Braden scale subscale | OR    | 95% CI      | <i>p</i> value |
|-----------------------|-------|-------------|----------------|
| Sensory perception    | 1.564 | 1.046–2.338 | 0.029          |
| Moisture              | 1.119 | 0.792–1.579 | 0.524          |
| Activity              | 1.444 | 0.487–4.285 | 0.508          |
| Mobility              | 1.794 | 0.974–3.305 | 0.061          |
| Nutrition             | 0.952 | 0.692–1.308 | 0.759          |
| Friction/Shear        | 1.930 | 1.065–3.495 | 0.030          |

OR, odds ratio; CI, confidence interval.
